# Supplementary material
Source: publisher figshare collection journal article supplement (https://karger.figshare.com/ndownloader/files/31070413)
Supplement: Supplementary file 1 [file 31070413]

Supplementary Table 1. Hazard ratios (95%CI) for stroke incidence with SUA relative change levels stratified by sex.

| △UA  (Relative, %) | Incidents / participants | Model 1 | | Model 2 | | Model 3 | |
| --- | --- | --- | --- | --- | --- | --- | --- |
| HR (95%CI) | *p value* | HR (95%CI) | *p value* | HR (95%CI) | *p value* |
| Males |  |  |  |  |  |  |  |
| Per 10% increase | 552/14347 | 1.098(1.051,1.147) | <0.001 | 1.044(0.993,1.097) | 0.095 | 1.055(1.001,1.113) | 0.046 |
| >30% loss | 15/309 | 1.222(0.726,2.058) | 0.451 | 1.216(0.722,2.048) | 0.462 | 1.046(0.615,1.779) | 0.868 |
| 20-30% loss | 47/1154 | 1.041(0.762,1.421) | 0.802 | 1.158(0.847,1.583) | 0.359 | 1.088(0.791,1.495) | 0.605 |
| 10-20% loss | 113/3072 | 0.986(0.790,1.232) | 0.904 | 1.145(0.916,1.432) | 0.234 | 1.108(0.884,1.388) | 0.375 |
| ±10% | 252/7344 | 1.000 | - | 1.000 | - | 1.000 | - |
| 10-20% gain | 69/1445 | 1.495(1.146,1.952) | 0.003 | 1.295(0.991,1.692) | 0.058 | 1.351(1.031,1.769) | 0.030 |
| 20-30% gain | 31/577 | 1.675(1.154,2.433) | 0.007 | 1.309(0.900,1.904) | 0.159 | 1.219(0.833,1.783) | 0.308 |
| >30% gain | 25/446 | 1.843(1.221,2.780) | 0.004 | 1.433(0.948,2.166) | 0.088 | 1.330(0.871,2.032) | 0.187 |
| *p* for trend |  | 0.001 | | 0.307 | | 0.227 | |
| Females |  |  |  |  |  |  |  |
| Per 10% increase | 347/8915 | 1.080(1.030,1.133) | 0.002 | 1.005(0.999,1.012) | 0.117 | 1.006(0.999,1.013) | 0.093 |
| >30% loss | 9/217 | 1.016(0.519,1.991) | 0.963 | 1.153(0.588,2.262) | 0.678 | 1.048(0.526,2.088) | 0.894 |
| 20-30% loss | 24/646 | 0.924(0.601,1.421) | 0.718 | 1.083(0.702,1.670) | 0.720 | 1.036(0.668,1.608) | 0.875 |
| 10-20% loss | 46/1466 | 0.791(0.569,1.099) | 0.163 | 0.866(0.622,1.206) | 0.395 | 0.897(0.642,1.252) | 0.521 |
| ±10% | 153/4094 | 1.000 | - | 1.000 | - | 1.000 | - |
| 10-20% gain | 53/1275 | 1.146(0.839,1.567) | 0.393 | 1.022(0.747,1.399) | 0.892 | 1.028(0.749,1.410) | 0.865 |
| 20-30% gain | 33/657 | 1.430(0.981,2.083) | 0.063 | 1.277(0.875,1.863) | 0.205 | 1.334(0.909,1.955) | 0.141 |
| >30% gain | 29/560 | 1.493(1.004,2.221) | 0.048 | 1.354(0.909,2.016) | 0.136 | 1.376(0.913,2.073) | 0.127 |
| *p* for trend |  | 0.003 | | 0.117 | | 0.093 | |

Model 1: unadjusted

Model 2: adjusted for sex, age, education levels, household income, occupation, smoking status, drinking status, exercising status, and family history of stroke.

Model 3: adjusted for model 2 plus serum uric acid, body mass index, systolic blood pressure, diastolic blood pressure, total cholesterol, triglycerides, high-density lipoprotein cholesterol, low-density lipoprotein cholesterol, fasting plasma glucose, and estimated glomerular filtration rate.

SUA, serum uric acid; HR, hazard ratio; CI, confidence interval.
